# Supplementary material
Source: PubMed Central journal article supplement (PMC6563568)
Supplement: jamaneurol-76-710-s001.pdf [file jamaneurol-76-710-s001.pdf]

## Supplementary Online Content

Heckman MG, Brennan RR, Labbé C, et al. Association of *MAPT* subhaplotypes with risk of progressive supranuclear palsy and severity of tau pathology. *JAMA Neurol*. Published online March 18, 2019. doi:10.1001/jamaneurol.2019.0250

**eTable 1.** Allele and Genotype Counts and Frequencies

**eTable 2.** Summary of Semi-Quantitative Tau Pathology Measures for CB, NFT, TA, and NT

**eTable 3.** Number of PSP Patients and Controls Needed to Have 80% Power at the  $P < .0025$  Significance Level to Detect Given Odds Ratios at Various Haplotype Frequencies in Controls

**eTable 4.** Number of PSP Patients Needed to Have 80% Power at the  $P < .0031$  (Analysis of CB, NFT, and NT Overall Tau Pathology Scores) and  $P < .0029$  (Analysis of TA Overall Tau Pathology Score) Significance Levels to Detect Given Mean Differences at Various Haplotype Frequencies

**eTable 5.**  $P$  Values for Association Between *MAPT* Haplotypes and Semi-Quantitative Tau Pathology Measures (0=none; 1=mild; 2=moderate; 3=severe) in Each Separate Neuroanatomical Region for Haplotypes That Showed a Nominally Significant ( $P < 0.05$ ) Association With Overall Tau Pathology Scores

**eTable 6.** Details of Strongest Associations ( $P \leq 0.001$ ) Between *MAPT* Haplotypes and Semi-Quantitative Tau Pathology Measures in Specific Neuroanatomical Regions

This supplementary material has been provided by the authors to give readers additional information about their work.

**eTable 1. Allele and Genotype Counts and Frequencies**

| Variant      | Minor allele count and frequency | Major allele count and frequency | Genotype 1 count and frequency | Genotype 2 count and frequency | Genotype 3 count and frequency |
|--------------|----------------------------------|----------------------------------|--------------------------------|--------------------------------|--------------------------------|
| rs1467967    |                                  |                                  |                                |                                |                                |
| PSP patients | G: 558 (34.8%)                   | A: 1046 (65.2%)                  | AA: 341 (42.5%)                | AG: 364 (45.4%)                | GG: 97 (12.1%)                 |
| Controls     | G: 869 (32.4%)                   | A: 1775 (67.6%)                  | AA: 603 (46.0%)                | AG: 569 (43.4%)                | GG: 140 (11.7%)                |
| rs242557     |                                  |                                  |                                |                                |                                |
| PSP patients | A: 904 (56.4%)                   | G: 700 (43.6%)                   | GG: 154 (19.2%)                | AG: 392 (48.9%)                | AA: 256 (31.9%)                |
| Controls     | A: 965 (36.8%)                   | G: 1659 (63.2%)                  | GG: 548 (20.9%)                | AG: 563 (21.5%)                | AA: 201 (7.7%)                 |
| rs3785883    |                                  |                                  |                                |                                |                                |
| PSP patients | A: 338 (21.1%)                   | G: 1266 (78.9%)                  | GG: 514 (64.1%)                | AG: 238 (29.7%)                | AA: 50 (6.2%)                  |
| Controls     | A: 472 (18.0%)                   | G: 2152 (82.0%)                  | GG: 879 (67.0%)                | AG: 394 (30.0%)                | AA: 39 (3.0%)                  |
| rs2471738    |                                  |                                  |                                |                                |                                |
| PSP patients | T: 460 (28.7%)                   | C: 1144 (71.3%)                  | CC: 412 (51.4%)                | CT: 320 (39.9%)                | TT: 70 (8.7%)                  |
| Controls     | T: 542 (20.7%)                   | C: 2082 (79.3%)                  | CC: 842 (64.2%)                | CT: 398 (30.3%)                | TT: 72 (5.5%)                  |
| rs8070723    |                                  |                                  |                                |                                |                                |
| PSP patients | G: 85 (5.3%)                     | A: 1519 (94.7%)                  | AA: 720 (89.8%)                | AG: 79 (9.9%)                  | GG: 3 (0.4%)                   |
| Controls     | G: 603 (23.0%)                   | A: 2021 (77.0%)                  | AA: 784 (59.8%)                | AG: 453 (34.5%)                | GG: 75 (5.7%)                  |
| rs7521       |                                  |                                  |                                |                                |                                |
| PSP patients | G: 679 (42.3%)                   | A: 925 (57.7%)                   | AA: 272 (33.9%)                | AG: 381 (47.5%)                | GG: 149 (18.6%)                |
| Controls     | G: 1401 (53.4%)                  | A: 1223 (46.6%)                  | AA: 296 (22.6%)                | AG: 631 (48.1%)                | GG: 385 (29.3%)                |

**eTable 2.** Summary of Semi-Quantitative Tau Pathology Measures for CB, NFT, TA, and NT

| Neuroanatomical region                                                                    | CB          | NFT         | TA          | NT          |
|-------------------------------------------------------------------------------------------|-------------|-------------|-------------|-------------|
| <b>Basal nucleus</b>                                                                      |             |             |             |             |
| Missing                                                                                   | 20          | 1           | 43          | 4           |
| 0=None                                                                                    | 183 (23.4%) | 1 (0.1%)    | 391 (51.5%) | 31 (3.9%)   |
| 1=Mild                                                                                    | 530 (67.8%) | 24 (3.0%)   | 323 (42.6%) | 156 (19.5%) |
| 2=Moderate                                                                                | 65 (8.3%)   | 259 (32.3%) | 44 (5.8%)   | 319 (40.0%) |
| 3=Severe                                                                                  | 4 (0.5%)    | 517 (64.5%) | 1 (0.1%)    | 292 (36.5%) |
| <b>Caudate putamen</b>                                                                    |             |             |             |             |
| Missing                                                                                   | 1           | 0           | 1           | 12          |
| 0=None                                                                                    | 24 (3.0%)   | 1 (0.1%)    | 3 (0.4%)    | 42 (5.3%)   |
| 1=Mild                                                                                    | 416 (51.9%) | 277 (34.5%) | 58 (7.2%)   | 470 (59.5%) |
| 2=Moderate                                                                                | 250 (31.2%) | 458 (57.1%) | 188 (23.5%) | 245 (31.0%) |
| 3=Severe                                                                                  | 111 (13.9%) | 66 (8.2%)   | 552 (68.9%) | 33 (4.2%)   |
| <b>Globus pallidus</b>                                                                    |             |             |             |             |
| Missing                                                                                   | 2           | 1           | 37          | 7           |
| 0=None                                                                                    | 15 (1.9%)   | 2 (0.2%)    | 276 (36.1%) | 33 (4.2%)   |
| 1=Mild                                                                                    | 148 (18.5%) | 136 (17.0%) | 311 (40.7%) | 170 (21.4%) |
| 2=Moderate                                                                                | 292 (36.5%) | 455 (56.8%) | 159 (20.8%) | 356 (44.8%) |
| 3=Severe                                                                                  | 345 (43.1%) | 208 (26.0%) | 19 (2.5%)   | 236 (29.7%) |
| <b>Hypothalamus</b>                                                                       |             |             |             |             |
| Missing                                                                                   | 79          | 19          | 87          | 26          |
| 0=None                                                                                    | 419 (58.0%) | 0 (0%)      | 566 (79.2%) | 67 (8.6%)   |
| 1=Mild                                                                                    | 291 (40.2%) | 40 (5.1%)   | 138 (19.3%) | 353 (45.5%) |
| 2=Moderate                                                                                | 12 (1.7%)   | 254 (32.4%) | 7 (1.0%)    | 249 (32.1%) |
| 3=Severe                                                                                  | 1 (0.1%)    | 489 (62.5%) | 4 (0.6%)    | 107 (13.8%) |
| <b>Motor cortex</b>                                                                       |             |             |             |             |
| Missing                                                                                   | 4           | 2           | 5           | 13          |
| 0=None                                                                                    | 22 (2.8%)   | 10 (1.3%)   | 15 (1.9%)   | 47 (6.0%)   |
| 1=Mild                                                                                    | 156 (19.5%) | 183 (22.9%) | 123 (15.4%) | 180 (22.8%) |
| 2=Moderate                                                                                | 369 (46.2%) | 418 (52.3%) | 198 (24.8%) | 302 (38.3%) |
| 3=Severe                                                                                  | 251 (31.5%) | 189 (23.6%) | 461 (57.8%) | 260 (33.0%) |
| <b>Subthalamic nucleus</b>                                                                |             |             |             |             |
| Missing                                                                                   | 2           | 2           | 16          | 4           |
| 0=None                                                                                    | 4 (0.5%)    | 1 (0.1%)    | 162 (20.6%) | 3 (0.4%)    |
| 1=Mild                                                                                    | 157 (19.6%) | 64 (8.0%)   | 205 (26.1%) | 36 (4.5%)   |
| 2=Moderate                                                                                | 334 (41.8%) | 250 (31.3%) | 210 (26.7%) | 102 (12.8%) |
| 3=Severe                                                                                  | 305 (38.1%) | 485 (60.6%) | 209 (26.6%) | 657 (82.3%) |
| <b>Temporal cortex</b>                                                                    |             |             |             |             |
| Missing                                                                                   | 60          | 19          | 40          | 83          |
| 0=None                                                                                    | 456 (61.5%) | 155 (19.8%) | 184 (24.1%) | 533 (74.1%) |
| 1=Mild                                                                                    | 255 (34.4%) | 484 (61.8%) | 461 (60.5%) | 96 (13.4%)  |
| 2=Moderate                                                                                | 28 (3.8%)   | 96 (12.3%)  | 101 (13.3%) | 33 (4.6%)   |
| 3=Severe                                                                                  | 3 (0.4%)    | 48 (6.1%)   | 16 (2.1%)   | 57 (7.9%)   |
| CB=coiled bodies; NFT=neurofibrillary tangles; TA=tufted astrocytes; NT=neuropil threads. |             |             |             |             |

**eTable 2 (continued).** Summary of Semi-Quantitative Tau Pathology Measures for CB, NFT, TA, and NT

| Neuroanatomical region                                                                                                                                                           | CBs         | NFTs        | TAs         | NTs         |
|----------------------------------------------------------------------------------------------------------------------------------------------------------------------------------|-------------|-------------|-------------|-------------|
| <b>Thalamic fasciculus</b>                                                                                                                                                       |             |             |             |             |
| Missing                                                                                                                                                                          | 2           | ---         | ---         | 3           |
| 0=None                                                                                                                                                                           | 2 (0.3%)    | ---         | ---         | 5 (0.6%)    |
| 1=Mild                                                                                                                                                                           | 77 (9.6%)   | ---         | ---         | 83 (10.4%)  |
| 2=Moderate                                                                                                                                                                       | 271 (33.9%) | ---         | ---         | 293 (36.7%) |
| 3=Severe                                                                                                                                                                         | 450 (56.3%) | ---         | ---         | 418 (52.3%) |
| <b>Ventral thalamus</b>                                                                                                                                                          |             |             |             |             |
| Missing                                                                                                                                                                          | 1           | 1           | 14          | 2           |
| 0=None                                                                                                                                                                           | 6 (0.7%)    | 4 (0.5%)    | 82 (10.4%)  | 9 (1.1%)    |
| 1=Mild                                                                                                                                                                           | 121 (15.1%) | 151 (18.9%) | 303 (38.5%) | 35 (4.4%)   |
| 2=Moderate                                                                                                                                                                       | 280 (35.0%) | 429 (53.6%) | 297 (37.7%) | 202 (25.3%) |
| 3=Severe                                                                                                                                                                         | 394 (49.2%) | 217 (27.1%) | 106 (13.5%) | 554 (69.3%) |
| <b>Cerebellar white matter</b>                                                                                                                                                   |             |             |             |             |
| Missing                                                                                                                                                                          | 5           | ---         | ---         | 10          |
| 0=None                                                                                                                                                                           | 20 (2.5%)   | ---         | ---         | 52 (6.6%)   |
| 1=Mild                                                                                                                                                                           | 157 (19.7%) | ---         | ---         | 341 (43.1%) |
| 2=Moderate                                                                                                                                                                       | 371 (46.5%) | ---         | ---         | 249 (31.4%) |
| 3=Severe                                                                                                                                                                         | 249 (31.2%) | ---         | ---         | 150 (18.9%) |
| <b>Dentate nucleus</b>                                                                                                                                                           |             |             |             |             |
| Missing                                                                                                                                                                          | 31          | 9           | 83          | 8           |
| 0=None                                                                                                                                                                           | 187 (24.3%) | 3 (0.4%)    | 612 (85.1%) | 17 (2.1%)   |
| 1=Mild                                                                                                                                                                           | 515 (66.8%) | 114 (14.4%) | 96 (13.4%)  | 260 (32.7%) |
| 2=Moderate                                                                                                                                                                       | 67 (8.7%)   | 312 (39.3%) | 10 (1.4%)   | 461 (58.1%) |
| 3=Severe                                                                                                                                                                         | 2 (0.3%)    | 364 (45.9%) | 1 (0.1%)    | 56 (7.1%)   |
| <b>Inferior olive</b>                                                                                                                                                            |             |             |             |             |
| Missing                                                                                                                                                                          | 58          | 53          | 91          | 50          |
| 0=None                                                                                                                                                                           | 89 (12.0%)  | 27 (3.6%)   | 496 (69.8%) | 11 (1.5%)   |
| 1=Mild                                                                                                                                                                           | 504 (67.7%) | 312 (41.7%) | 190 (26.7%) | 52 (6.9%)   |
| 2=Moderate                                                                                                                                                                       | 140 (18.8%) | 292 (39.0%) | 24 (3.4%)   | 171 (22.7%) |
| 3=Severe                                                                                                                                                                         | 11 (1.5%)   | 118 (15.8%) | 1 (0.1%)    | 518 (68.9%) |
| <b>Locus ceruleus</b>                                                                                                                                                            |             |             |             |             |
| Missing                                                                                                                                                                          | 135         | 38          | ---         | 39          |
| 0=None                                                                                                                                                                           | 592 (88.8%) | 0 (0.0%)    | ---         | 12 (1.6%)   |
| 1=Mild                                                                                                                                                                           | 67 (10.0%)  | 27 (3.5%)   | ---         | 100 (13.1%) |
| 2=Moderate                                                                                                                                                                       | 6 (0.9%)    | 218 (28.5%) | ---         | 328 (43.0%) |
| 3=Severe                                                                                                                                                                         | 2 (0.3%)    | 519 (67.9%) | ---         | 323 (42.3%) |
| <b>Medullary tegmentum</b>                                                                                                                                                       |             |             |             |             |
| Missing                                                                                                                                                                          | 43          | 38          | 126         | 40          |
| 0=None                                                                                                                                                                           | 75 (9.9%)   | 1 (0.1%)    | 604 (89.3%) | 1 (0.1%)    |
| 1=Mild                                                                                                                                                                           | 409 (53.9%) | 10 (1.3%)   | 67 (9.9%)   | 35 (4.6%)   |
| 2=Moderate                                                                                                                                                                       | 237 (31.2%) | 174 (22.8%) | 4 (0.6%)    | 99 (13.0%)  |
| 3=Severe                                                                                                                                                                         | 38 (5.0%)   | 579 (75.8%) | 1 (0.1%)    | 627 (82.3%) |
| CB=coiled bodies; NFT=neurofibrillary tangles; TA=tufted astrocytes; NT=neuropil threads. --- is given when the given lesion was not assessed in the given anatomical structure. |             |             |             |             |

**eTable 2 (continued).** Summary of Semi-Quantitative Tau Pathology Measures for CB, NFT, TA, and NT

| Neuroanatomical region                                                                    | CBs         | NFTs        | TAs         | NTs         |
|-------------------------------------------------------------------------------------------|-------------|-------------|-------------|-------------|
| <b>Midbrain tectum</b>                                                                    |             |             |             |             |
| Missing                                                                                   | 6           | 19          | 23          | 6           |
| 0=None                                                                                    | 12 (1.5%)   | 1 (0.1%)    | 37 (4.7%)   | 5 (0.6%)    |
| 1=Mild                                                                                    | 84 (10.6%)  | 168 (21.5%) | 135 (17.3%) | 38 (4.8%)   |
| 2=Moderate                                                                                | 257 (32.3%) | 401 (51.2%) | 317 (40.7%) | 109 (13.7%) |
| 3=Severe                                                                                  | 443 (55.7%) | 213 (27.2%) | 290 (37.2%) | 644 (80.7%) |
| <b>Oculomotor complex</b>                                                                 |             |             |             |             |
| Missing                                                                                   | 151         | 110         | 183         | 111         |
| 0=None                                                                                    | 296 (45.5%) | 4 (0.6%)    | 498 (80.5%) | 23 (3.3%)   |
| 1=Mild                                                                                    | 295 (45.3%) | 133 (19.2%) | 104 (16.8%) | 158 (22.9%) |
| 2=Moderate                                                                                | 51 (7.8%)   | 280 (40.5%) | 16 (2.6%)   | 268 (38.8%) |
| 3=Severe                                                                                  | 9 (1.4%)    | 275 (39.7%) | 1 (0.2%)    | 242 (35.0%) |
| <b>Pontine base</b>                                                                       |             |             |             |             |
| Missing                                                                                   | 14          | 5           | 101         | 13          |
| 0=None                                                                                    | 84 (10.7%)  | 11 (1.4%)   | 632 (90.2%) | 47 (6.0%)   |
| 1=Mild                                                                                    | 494 (62.7%) | 93 (11.7%)  | 63 (9.0%)   | 208 (26.4%) |
| 2=Moderate                                                                                | 199 (25.3%) | 170 (21.3%) | 6 (0.9%)    | 375 (47.5%) |
| 3=Severe                                                                                  | 11 (1.4%)   | 523 (65.6%) | 0 (0%)      | 159 (20.2%) |
| <b>Pontine tegmentum</b>                                                                  |             |             |             |             |
| Missing                                                                                   | 27          | 10          | 92          | 23          |
| 0=None                                                                                    | 23 (3.0%)   | 0 (0.0%)    | 580 (81.7%) | 4 (0.5%)    |
| 1=Mild                                                                                    | 253 (32.6%) | 80 (10.1%)  | 115 (16.2%) | 44 (5.6%)   |
| 2=Moderate                                                                                | 354 (45.7%) | 311 (39.3%) | 13 (1.8%)   | 165 (21.2%) |
| 3=Severe                                                                                  | 145 (18.7%) | 401 (50.6%) | 2 (0.3%)    | 566 (72.7%) |
| <b>Red nucleus</b>                                                                        |             |             |             |             |
| Missing                                                                                   | 6           | 3           | 20          | 3           |
| 0=None                                                                                    | 21 (2.6%)   | 7 (0.9%)    | 132 (16.9%) | 13 (1.6%)   |
| 1=Mild                                                                                    | 118 (14.8%) | 188 (23.5%) | 260 (33.2%) | 74 (9.3%)   |
| 2=Moderate                                                                                | 215 (27.0%) | 369 (46.2%) | 261 (33.4%) | 182 (22.8%) |
| 3=Severe                                                                                  | 442 (55.5%) | 235 (29.4%) | 129 (16.5%) | 530 (66.3%) |
| <b>Substantia nigra</b>                                                                   |             |             |             |             |
| Missing                                                                                   | 5           | 3           | 29          | 3           |
| 0=None                                                                                    | 44 (5.5%)   | 0 (0%)      | 317 (41.0%) | 1 (0.1%)    |
| 1=Mild                                                                                    | 386 (48.6%) | 88 (11.0%)  | 300 (38.8%) | 167 (20.9%) |
| 2=Moderate                                                                                | 297 (37.3%) | 379 (47.4%) | 139 (18.0%) | 435 (54.4%) |
| 3=Severe                                                                                  | 69 (8.7%)   | 332 (41.6%) | 17 (2.2%)   | 196 (24.5%) |
| CB=coiled bodies; NFT=neurofibrillary tangles; TA=tufted astrocytes; NT=neuropil threads. |             |             |             |             |

**eTable 3.** Number of PSP Patients and Controls Needed to Have 80% Power at the  $P < .0025$  Significance Level to Detect Given Odds Ratios at Various Haplotype Frequencies in Controls

| Haplotype frequency in controls | Odds ratio | Number of PSP patients and controls needed have 80% power to detect the given odds ratio at the $P < .0025$ significance level. |                           |
|---------------------------------|------------|---------------------------------------------------------------------------------------------------------------------------------|---------------------------|
|                                 |            | Number of PSP patients needed                                                                                                   | Number of controls needed |
| 1.0%                            | 1.25       | 44,972                                                                                                                          | 73,754                    |
| 1.0%                            | 1.50       | 20,944                                                                                                                          | 12,771                    |
| 1.0%                            | 1.75       | 6,355                                                                                                                           | 16,777                    |
| 1.0%                            | 2.00       | 3,957                                                                                                                           | 6,489                     |
| 1.0%                            | 2.25       | 2,777                                                                                                                           | 4,554                     |
| 1.0%                            | 2.50       | 2,098                                                                                                                           | 3,441                     |
| 1.0%                            | 2.75       | 1,666                                                                                                                           | 2,732                     |
| 1.0%                            | 3.00       | 1,371                                                                                                                           | 2,248                     |
| 2.0%                            | 1.25       | 22,753                                                                                                                          | 37,315                    |
| 2.0%                            | 1.50       | 6,469                                                                                                                           | 10,609                    |
| 2.0%                            | 1.75       | 3,223                                                                                                                           | 5,286                     |
| 2.0%                            | 2.00       | 2,008                                                                                                                           | 3,293                     |
| 2.0%                            | 2.25       | 1,410                                                                                                                           | 2,312                     |
| 2.0%                            | 2.50       | 1,066                                                                                                                           | 1,748                     |
| 2.0%                            | 2.75       | 847                                                                                                                             | 1,389                     |
| 2.0%                            | 3.00       | 698                                                                                                                             | 1,145                     |
| 3.0%                            | 1.25       | 15,351                                                                                                                          | 25,176                    |
| 3.0%                            | 1.50       | 4,370                                                                                                                           | 7,167                     |
| 3.0%                            | 1.75       | 2,179                                                                                                                           | 3,574                     |
| 3.0%                            | 2.00       | 1,359                                                                                                                           | 2,229                     |
| 3.0%                            | 2.25       | 955                                                                                                                             | 1,566                     |
| 3.0%                            | 2.50       | 723                                                                                                                             | 1,186                     |
| 3.0%                            | 2.75       | 575                                                                                                                             | 943                       |
| 3.0%                            | 3.00       | 473                                                                                                                             | 776                       |
| 4.0%                            | 1.25       | 11,652                                                                                                                          | 19,109                    |
| 4.0%                            | 1.50       | 3,322                                                                                                                           | 5,448                     |
| 4.0%                            | 1.75       | 1,658                                                                                                                           | 2,719                     |
| 4.0%                            | 2.00       | 1,035                                                                                                                           | 1,697                     |
| 4.0%                            | 2.25       | 728                                                                                                                             | 1,194                     |
| 4.0%                            | 2.50       | 551                                                                                                                             | 904                       |
| 4.0%                            | 2.75       | 438                                                                                                                             | 718                       |
| 4.0%                            | 3.00       | 361                                                                                                                             | 592                       |
| 5.0%                            | 1.25       | 9,435                                                                                                                           | 15,473                    |
| 5.0%                            | 1.50       | 2,693                                                                                                                           | 4,417                     |
| 5.0%                            | 1.75       | 1,346                                                                                                                           | 2,207                     |
| 5.0%                            | 2.00       | 841                                                                                                                             | 1,379                     |
| 5.0%                            | 2.25       | 592                                                                                                                             | 971                       |
| 5.0%                            | 2.50       | 448                                                                                                                             | 735                       |
| 5.0%                            | 2.75       | 357                                                                                                                             | 585                       |
| 5.0%                            | 3.00       | 294                                                                                                                             | 482                       |
| 10.0%                           | 1.25       | 5,021                                                                                                                           | 8,234                     |
| 10.0%                           | 1.50       | 1,443                                                                                                                           | 2,367                     |
| 10.0%                           | 1.75       | 725                                                                                                                             | 1,189                     |
| 10.0%                           | 2.00       | 455                                                                                                                             | 746                       |
| 10.0%                           | 2.25       | 321                                                                                                                             | 526                       |
| 10.0%                           | 2.50       | 244                                                                                                                             | 400                       |
| 10.0%                           | 2.75       | 195                                                                                                                             | 320                       |
| 10.0%                           | 3.00       | 161                                                                                                                             | 264                       |
| 20.0%                           | 1.25       | 2,872                                                                                                                           | 4,710                     |
| 20.0%                           | 1.50       | 836                                                                                                                             | 1,371                     |
| 20.0%                           | 1.75       | 425                                                                                                                             | 697                       |
| 20.0%                           | 2.00       | 269                                                                                                                             | 441                       |
| 20.0%                           | 2.25       | 192                                                                                                                             | 315                       |
| 20.0%                           | 2.50       | 147                                                                                                                             | 241                       |
| 20.0%                           | 2.75       | 118                                                                                                                             | 194                       |
| 20.0%                           | 3.00       | 98                                                                                                                              | 161                       |

For the purposes of these sample size calculations, we assumed the same 0.61 to 1 ratio of PSP patients and controls that we had in our study.

**eTable 4.** Number of PSP Patients Needed to Have 80% Power at the  $P<.0031$  (Analysis of CB, NFT, and NT Overall Tau Pathology Scores) and  $P<.0029$  (Analysis of TA Overall Tau Pathology Score) Significance Levels to Detect Given Mean Differences at Various Haplotype Frequencies

|                     |                 | Number of PSP patients needed to have 80% power to detect the given mean difference at the $P<0.0031$ (analysis of CB, NFT and NT overall tau pathology scores) and $P<0.0029$ (analysis of TA overall tau pathology score) significance levels |                 |                |                |
|---------------------|-----------------|-------------------------------------------------------------------------------------------------------------------------------------------------------------------------------------------------------------------------------------------------|-----------------|----------------|----------------|
| Haplotype frequency | Mean difference | Analysis of CB                                                                                                                                                                                                                                  | Analysis of NFT | Analysis of NT | Analysis of TA |
| 1.0%                | 0.05            | 79,900                                                                                                                                                                                                                                          | 59,800          | 84,300         | 72,300         |
| 1.0%                | 0.10            | 20,000                                                                                                                                                                                                                                          | 15,000          | 21,100         | 18,100         |
| 1.0%                | 0.20            | 5,000                                                                                                                                                                                                                                           | 3,800           | 5,300          | 4,600          |
| 1.0%                | 0.30            | 2,300                                                                                                                                                                                                                                           | 1,700           | 2,400          | 2,100          |
| 1.0%                | 0.40            | 1,300                                                                                                                                                                                                                                           | 1,000           | 1,400          | 1,200          |
| 1.0%                | 0.50            | 800                                                                                                                                                                                                                                             | 700             | 900            | 800            |
| 2.0%                | 0.05            | 40,350                                                                                                                                                                                                                                          | 30,200          | 42,550         | 36,500         |
| 2.0%                | 0.10            | 10,100                                                                                                                                                                                                                                          | 7,550           | 10,650         | 9,150          |
| 2.0%                | 0.20            | 2,550                                                                                                                                                                                                                                           | 1,900           | 2,700          | 2,300          |
| 2.0%                | 0.30            | 1,150                                                                                                                                                                                                                                           | 850             | 1,200          | 1,050          |
| 2.0%                | 0.40            | 650                                                                                                                                                                                                                                             | 500             | 700            | 600            |
| 2.0%                | 0.50            | 450                                                                                                                                                                                                                                             | 350             | 450            | 400            |
| 3.0%                | 0.05            | 27,267                                                                                                                                                                                                                                          | 20,333          | 28,667         | 24,600         |
| 3.0%                | 0.10            | 6,800                                                                                                                                                                                                                                           | 5,100           | 7,167          | 6,167          |
| 3.0%                | 0.20            | 1,700                                                                                                                                                                                                                                           | 1,300           | 1,800          | 1,567          |
| 3.0%                | 0.30            | 767                                                                                                                                                                                                                                             | 600             | 800            | 700            |
| 3.0%                | 0.40            | 433                                                                                                                                                                                                                                             | 333             | 467            | 400            |
| 3.0%                | 0.50            | 300                                                                                                                                                                                                                                             | 233             | 300            | 267            |
| 4.0%                | 0.05            | 20,600                                                                                                                                                                                                                                          | 15,400          | 21,725         | 18,625         |
| 4.0%                | 0.10            | 5,150                                                                                                                                                                                                                                           | 3,850           | 5,450          | 4,675          |
| 4.0%                | 0.20            | 1,300                                                                                                                                                                                                                                           | 975             | 1,375          | 1,175          |
| 4.0%                | 0.30            | 600                                                                                                                                                                                                                                             | 450             | 625            | 525            |
| 4.0%                | 0.40            | 350                                                                                                                                                                                                                                             | 250             | 350            | 300            |
| 4.0%                | 0.50            | 225                                                                                                                                                                                                                                             | 175             | 225            | 200            |
| 5.0%                | 0.05            | 16,660                                                                                                                                                                                                                                          | 12,460          | 17,560         | 15,060         |
| 5.0%                | 0.10            | 4,180                                                                                                                                                                                                                                           | 3,120           | 4,400          | 3,780          |
| 5.0%                | 0.20            | 1,060                                                                                                                                                                                                                                           | 780             | 1,100          | 960            |
| 5.0%                | 0.30            | 480                                                                                                                                                                                                                                             | 360             | 500            | 440            |
| 5.0%                | 0.40            | 280                                                                                                                                                                                                                                             | 200             | 280            | 240            |
| 5.0%                | 0.50            | 180                                                                                                                                                                                                                                             | 140             | 180            | 160            |
| 10.0%               | 0.05            | 8,790                                                                                                                                                                                                                                           | 6,570           | 9,270          | 7,950          |
| 10.0%               | 0.10            | 2,200                                                                                                                                                                                                                                           | 1,650           | 2,320          | 1,990          |
| 10.0%               | 0.20            | 560                                                                                                                                                                                                                                             | 420             | 590            | 510            |
| 10.0%               | 0.30            | 250                                                                                                                                                                                                                                             | 190             | 270            | 230            |
| 10.0%               | 0.40            | 150                                                                                                                                                                                                                                             | 110             | 150            | 130            |
| 10.0%               | 0.50            | 100                                                                                                                                                                                                                                             | 80              | 100            | 90             |
| 20.0%               | 0.05            | 4,945                                                                                                                                                                                                                                           | 3,700           | 5,215          | 4,470          |
| 20.0%               | 0.10            | 1,240                                                                                                                                                                                                                                           | 925             | 1,305          | 1,120          |
| 20.0%               | 0.20            | 315                                                                                                                                                                                                                                             | 240             | 335            | 285            |
| 20.0%               | 0.30            | 145                                                                                                                                                                                                                                             | 110             | 150            | 130            |
| 20.0%               | 0.40            | 85                                                                                                                                                                                                                                              | 65              | 90             | 75             |
| 20.0%               | 0.50            | 55                                                                                                                                                                                                                                              | 45              | 60             | 50             |

CB=coiled bodies; NFT=neurofibrillary tangles; NT=neuropil threads; TA=tufted astrocytes.

These calculations assumed standard deviations in overall tau pathology scores of 0.37 for CB, 0.32 for NFT, 0.35 for TA, and 0.38 for NT, which was the case for our data.

**eTable 5.** *P* Values for Association Between *MAPT* Haplotypes and Semi-Quantitative Tau Pathology Measures (0=none; 1=mild; 2=moderate; 3=severe) in Each Separate Neuroanatomical Region for Haplotypes That Showed a Nominally Significant (*P*<0.05) Association With Overall Tau Pathology Scores

| Neuroanatomical region  | P-value for association between: |            |            |             |             |            |           |            |           |
|-------------------------|----------------------------------|------------|------------|-------------|-------------|------------|-----------|------------|-----------|
|                         | H1c and CB                       | H1c and TA | H1d and TA | H1e and NFT | H1q and NFT | H1q and NT | H2 and CB | H2 and NFT | H2 and NT |
| Basal nucleus           | 0.68                             | 0.001      | 0.56       | 0.95        | 0.30        | 0.99       | 0.38      | 0.34       | 0.26      |
| Caudate putamen         | 0.42                             | 0.019      | 0.090      | 0.66        | 0.006       | 0.001      | 0.17      | 0.57       | 0.48      |
| Globus pallidus         | 0.17                             | 0.050      | 0.97       | 0.86        | 0.51        | 0.46       | 0.12      | 0.012      | 0.14      |
| Hypothalamus            | 0.36                             | 0.12       | 0.031      | 0.18        | 0.18        | 0.38       | 0.67      | 0.83       | 0.55      |
| Motor cortex            | 0.40                             | 0.51       | 0.78       | 0.21        | 0.005       | 0.002      | 0.064     | 0.27       | 0.093     |
| Subthalamic nucleus     | 0.036                            | 0.32       | 0.28       | 0.034       | 0.84        | 0.064      | 0.035     | 0.80       | 0.002     |
| Temporal cortex         | 0.22                             | 0.37       | 0.50       | 0.21        | 0.080       | 0.16       | 0.37      | 0.21       | 0.071     |
| Thalamic fasciculus     | 0.58                             | ---        | ---        | ---         | ---         | 0.010      | 0.45      | ---        | 0.78      |
| Ventral thalamus        | 0.061                            | 0.004      | 0.082      | 0.014       | 0.24        | 0.075      | 0.006     | 0.10       | 0.067     |
| Cerebellar white matter | 0.46                             | ---        | ---        | ---         | ---         | 0.12       | 0.034     | ---        | 0.54      |
| Dentate nucleus         | 0.13                             | 0.64       | 0.58       | 0.26        | 0.70        | 0.25       | 0.62      | 0.23       | 0.33      |
| Inferior olive          | 0.001                            | 0.087      | 0.31       | 0.080       | 0.83        | 0.30       | 0.058     | 0.027      | 0.089     |
| Locus ceruleus          | 0.22                             | ---        | ---        | 0.18        | 0.005       | 0.50       | 0.95      | 0.20       | 0.040     |
| Medullary tegmentum     | <0.001                           | 0.34       | 0.44       | 0.031       | 0.99        | 0.52       | 0.054     | 0.013      | 0.001     |
| Midbrain tectum         | 0.24                             | 0.73       | 0.051      | <0.001      | 0.36        | 0.012      | 0.031     | 0.17       | 0.57      |
| Oculomotor complex      | 0.037                            | 0.28       | 0.032      | 0.32        | 0.031       | 0.16       | 0.15      | 0.001      | 0.71      |
| Pontine base            | 0.35                             | 0.62       | 0.81       | 0.51        | 0.56        | 0.46       | 0.43      | 0.22       | 0.95      |
| Pontine tegmentum       | 0.002                            | 0.89       | 0.062      | 0.65        | 0.46        | 0.24       | 0.12      | 0.11       | 0.029     |
| Red nucleus             | 0.012                            | 0.007      | 0.21       | 0.38        | 0.54        | 0.024      | 0.13      | 0.029      | 0.072     |
| Substantia nigra        | 0.10                             | 0.58       | 0.008      | 0.24        | 0.49        | >0.99      | 0.14      | 0.33       | 0.10      |

CB=coiled bodies; NFT=neurofibrillary tangles; TA=tufted astrocytes; NT=neuropil threads. P-values result from score tests of association (under a proportional odds logistic regression framework) that were adjusted for age at death, sex, Braak stage, and Thal phase. --- is given when the given tau pathology measure was not measured in the given neuroanatomical region.

**eTable 6.** Details of Strongest Associations ( $P \leq 0.001$ ) Between *MAPT* Haplotypes and Semi-Quantitative Tau Pathology Measures in Specific Neuroanatomical Regions

| Association | Neuroanatomical region | Dichotomized semi-quantitative tau pathology outcome <sup>1</sup> | Haplotype frequency (%)                    |                                                | P-value |
|-------------|------------------------|-------------------------------------------------------------------|--------------------------------------------|------------------------------------------------|---------|
|             |                        |                                                                   | Dichotomized tau pathology outcome present | Dichotomized tau pathology outcome not present |         |
| H1c and CB  | Inferior olive         | Moderate or Severe                                                | 25.0                                       | 18.0                                           | 0.001   |
| H1c and CB  | Medullary tegmentum    | Moderate or Severe                                                | 26.5                                       | 16.1                                           | <0.001  |
| H1c and TA  | Basal nucleus          | Mild, Moderate, or Severe                                         | 23.6                                       | 16.8                                           | 0.001   |
| H1e and NFT | Midbrain tectum        | Severe                                                            | 15.1                                       | 6.5                                            | <0.001  |
| H1q and NT  | Caudate putamen        | Moderate or Severe                                                | 0.2                                        | 1.7                                            | 0.001   |
| H2 and NFT  | Oculomotor complex     | Severe                                                            | 2.1                                        | 6.5                                            | 0.001   |
| H2 and NT   | Medullary tegmentum    | Severe                                                            | 3.7                                        | 9.3                                            | 0.001   |

CB=coiled bodies; NFT=neurofibrillary tangles; TA=tufted astrocytes; NT=neuropil threads. <sup>1</sup>Semi-quantitative tau pathology measures in each neuroanatomical region were considered as ordinal variables (0=none; 1=mild; 2=moderate; 3=severe) in all statistical association analysis, however for the purposes of presentation in this table only these measures were also dichotomized (dichotomization was performed so that the two categories were as balanced as possible in terms of sample sizes).
